# Supplementary material for: Development and Validation of an Instrument for Measuring the Quality of Teamwork in Teaching Teams in Postgraduate Medical Training (TeamQ)
Source: PubMed Central journal article supplement (PMC4231160; doi:10.1371/journal.pone.0112805), 2014-11-13
Supplement: pone.0112805.s002.pdf [file pone.0112805.s002.pdf]

Aan de heer prof.dr. M.J. Heineman  
Gynaecologie en Obstetrie  
H4-220

Academisch Medisch Centrum  
Universiteit van Amsterdam

Amsterdam, 16 april 2012  
uw kenmerk:  
ons kenmerk: W12\_073 # 12.17.0090  
betreft:

**Medisch Ethische Toetsingscommissie**  
E2-236  
doorkiesnummer: 566 7389/566 6730  
fax: 5669015

**Uw brief: Onderzoek naar het functioneren van medisch specialisten in hun rol van opleiders van arts-assistenten in opleiding tot specialist (aios)**

Geachte heer Heineman,

Uw brief d.d. 8 maart 2012 betreffende bovengenoemde studie is op 27 maart jl. besproken in de vergadering van het dagelijks bestuur.

Naar ons oordeel valt bovengenoemde studie niet binnen de reikwijdte van de wet medisch-wetenschappelijk onderzoek met mensen daar er bij deze studie geen sprake is van een medisch wetenschappelijke vraagstelling.

Derhalve behoeft het voorstel formeel niet te worden beoordeeld door een erkende toetsingscommissie.

Met vriendelijke groet,  
namens de Medisch Ethische Toetsingscommissie,

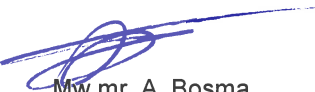  
Mw. mr. A. Bosma  
ambtelijk secretaris

Bijlage: verklaring in het Engels (z.o.z)

c.c. pdf per email: [r.m.vanderleeuw@amc.uva.nl](mailto:r.m.vanderleeuw@amc.uva.nl); [m.j.lombarts@amc.uva.nl](mailto:m.j.lombarts@amc.uva.nl)

To whom it may concern,

Referring to our letter of April 16, 2012 (reference number W12\_073 # 12.17.0090) we are pleased to confirm that the Medical Research Involving Human Subjects Act (WMO) does not apply to the above mentioned study and that an official approval of this study by our committee is not required.

Yours sincerely,  
on behalf of the Medical Ethics Review Committee,



Mrs. A. Bosma, LL.M.  
secretary
